# Supplementary material for: Cobalt ion-incorporated nanocrystalline spinel cubic zinc ferrite for targeted magnetic hyperthermia and sensing applications
Source: Royal Society of Chemistry journal article supplement (doi:10.1039/d5ra01897h), 2025-01-01
Supplement: d5ra01897h1.pdf [file d5ra01897h1.pdf]

1 **Electronic Supplementary Information**

2 **Cobalt ions incorporated Nanocrystalline spinel cubic zinc ferrite for**  
3 **targeted magnetic hyperthermia and sensing applications**

4 Mritunjoy Prasad Ghosh<sup>1\*</sup>, Rahul Sonkar<sup>1,2</sup>, Gongotree Phukan<sup>3</sup>, Jyoti Prasad Borah<sup>3</sup>,  
5 Devasish Chowdhury<sup>1,2\*</sup>

6 <sup>1</sup>*Material Nanochemistry Laboratory, Physical Sciences Division, Institute of Advanced*  
7 *Study in Science and Technology, Paschim Boragaon, Garchuk, Guwahati-781035, Assam,*  
8 *India*

9 <sup>2</sup>*Academy of Scientific and Innovative Research (AcSIR), Ghaziabad 201002, India*

10 <sup>3</sup>*Nanomagnetism Laboratory, Department of Physics, National Institute of Technology*  
11 *Nagaland, Dimapur-797103, Nagaland, India*

12 \*Email: [mritunjoyprasad92@gmail.com](mailto:mritunjoyprasad92@gmail.com) [devasish@iasst.gov.in](mailto:devasish@iasst.gov.in) (Email of the corresponding  
13 authors)

14  
15  
16 **Synthesis of cobalt doped and bare zinc ferrite nanoparticles**

17 A standard chemical co-precipitation method was employed to prepare the doped and bare  
18 zinc ferrite nanoparticles.<sup>1,2</sup> The chemical composition of the as-synthesized ferrite  
19 nanoparticles was  $\text{Co}_x\text{Zn}_{1-x}\text{Fe}_2\text{O}_4$  ( $x = 0, 0.10, 0.30$  and  $0.50$ ). High-purity chemicals, namely  
20  $\text{Co}(\text{NO}_3)_2 \cdot 6\text{H}_2\text{O}$ ,  $\text{Zn}(\text{NO}_3)_2 \cdot 9\text{H}_2\text{O}$ , and  $\text{Fe}(\text{NO}_3)_3 \cdot 6\text{H}_2\text{O}$  were used to fabricate ferrite  
21 nanoparticles without additional purification. In stoichiometric quantities, these chemicals  
22 were dissolved in 200 ml of distilled water. The resulting solution in the beaker underwent  
23 continuous stirring on a magnetic stirrer at 700 rpm to achieve homogeneity. The  
24 precipitating reagent, sodium hydroxide (NaOH) solution, was added further drop-wise under

25 identical stirring conditions to raise the mixture's pH to 11, facilitating precipitation. After  
26 reaching a pH of 11, the solution was digested for two hours at a constant temperature of  
27 80°C with continuous stirring to certify the complete reaction. The mixture was then cooled  
28 to room temperature and washed multiple times with distilled water and methanol to achieve  
29 a neutral pH of 7. The resulting precipitate was air-dried and ground into a fine powder.  
30 Subsequently, the pure and doped powder samples underwent calcination at 500°C for 5  
31 hours in a furnace to enhance nano-crystallinity. To prevent quenching effects during  
32 calcination, the furnace temperature was raised to 500°C, maintained for 5 hours, and then  
33 gradually lowered.<sup>2</sup> The prepared ferrite samples were named Co-00 (ZNF), Co-10 (ZNF),  
34 Co-30 (ZNF), and Co-50 (ZNF) corresponding to increasing percentages of Co ions. All the  
35 synthesized nanopowder samples were further subjected to various characterizations.

#### 36 **Measurement set-up for metribuzin sensing**

37 Nanocrystalline undoped and cobalt doped zinc ferrite (ZNF) samples were synthesized and  
38 formed into thin circular pellets with a 13 mm diameter using hydraulic pressure for precise  
39 measurements.<sup>3</sup> Solutions with concentrations of 1 part per million (ppm) and 2 ppm were  
40 prepared for the following analytes: metribuzin, glyphosate, citric acid, and urea. The  
41 dielectric value of a control sample was initially determined. Then, the following process was  
42 repeated for each analyte concentration.

43 For metribuzin:

44 1. 100 µl of 1 ppm metribuzin solution was dropped onto the pellet

45 2. The pellet was dried and the dielectric measured

46 3. 100 µl of 2 ppm metribuzin solution was dropped onto a new pellet

47 4. The pellet was dried and the dielectric measured

48 This process was repeated for glyphosate, citric acid, and urea solutions for Co-00 (ZNF) and  
49 Co-50 (ZNF) samples. Values of the dielectric constant were recorded at room temperature  
50 for each sample to create the Cole-Cole plot.

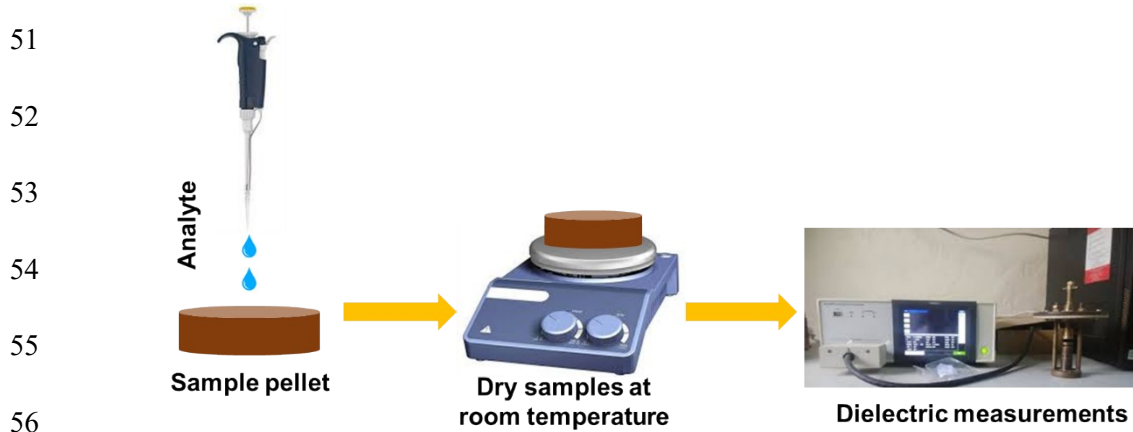

57 **Schematic drawing of the experimental setup**

58

### 59 **Characterization techniques**

60 The physical characterization of Co-doped zinc ferrite (ZNF) samples was thoroughly  
61 conducted using various techniques. Room temperature XRD profiles were captured with a  
62 Bruker D8 Advance powder X-ray diffractometer utilizing Cu-K $\alpha$  radiation (wavelength  
63 1.5406 Å). The powder samples were scanned at a rate of 0.02°/sec over a range of 20° to  
64 80°. The X-ray diffractometer operated at 40 kV and 40 mA. The morphology, shape, and  
65 mean size of both pristine and doped ferrite nanoparticles were investigated using HRTEM  
66 (JEM-2100F, JEOL, Japan), operating at an accelerating voltage of 200 kV. Raman spectra  
67 were recorded for each ferrite at 300 K using a Raman spectrometer (Renishaw, UK) and a  
68 laser source having 473 nm wavelength between 100 to 800 cm<sup>-1</sup>. FTIR spectra for entire  
69 samples were registered at 300 K with Perkin-Elmer FTIR spectrophotometers. Magnetic  
70 properties at various temperatures were measured using a SQUID-VSM (Quantum Design)  
71 magnetometer. Absorption data, and optical properties were explored using a UV DRS

72 spectrometer (UV-2550, Shimadzu, USA). The dielectric properties along with sensing  
 73 abilities at room temperature for all the prepared samples were examined using an LCR meter  
 74 (HIOKI, IM 3536). Hyperthermia applications were tested for all the as-synthesized ferrite  
 75 samples using an induction heating experiment with Ambrell equipment (Scottsville, USA).

76 Table S1: Represents refinement parameters, including goodness of fit ( $\chi^2$ ), reliability factors  
 77 ( $R_p$ ,  $R_{wp}$ ,  $R_F^2$ ) and unit cell parameters for all the samples.

| Sample-Id                                     | Co-00 (ZNF)  | Co-10 (ZNF)  | Co-30 (ZNF)  | Co-50 (ZNF)  |
|-----------------------------------------------|--------------|--------------|--------------|--------------|
| Space group                                   | <i>Fd-3m</i> | <i>Fd-3m</i> | <i>Fd-3m</i> | <i>Fd-3m</i> |
| <b>Unit cell parameters</b>                   |              |              |              |              |
| <b>a (Å) ± 0.001</b>                          | 8.431        | 8.412        | 8.393        | 8.384        |
| <b>Density (g/cm<sup>3</sup>)</b>             | 5.343        | 5.386        | 5.436        | 5.468        |
| <b>D (nm) ± 0.1</b>                           | 9.7          | 10.5         | 20.1         | 12.7         |
| <b>Microstrain (X 10<sup>-3</sup>) ± 0.01</b> | -0.65        | -0.66        | 5.06         | 3.89         |
| <b>Refinement parameters</b>                  |              |              |              |              |
| <b>R<sub>wp</sub> (%)</b>                     | 5.49         | 5.51         | 4.65         | 4.19         |
| <b>R<sub>p</sub> (%)</b>                      | 4.45         | 4.34         | 3.70         | 3.32         |
| <b><math>\chi^2</math></b>                    | 1.13         | 1.21         | 1.19         | 1.06         |

78

79 Table S2: Contains cationic distribution, ionic radii of cations and theoretical lattice constants  
 80 of all the nanoferrites.

| Sample Id          | Tetrahedral site (A)                                            | Octahedral site (B)                                             | r <sub>A</sub> (Å) | r <sub>B</sub> (Å) | a <sub>th</sub> (Å) |
|--------------------|-----------------------------------------------------------------|-----------------------------------------------------------------|--------------------|--------------------|---------------------|
| <b>Co-00 (ZNF)</b> | Zn <sup>2+</sup> <sub>1.0</sub>                                 | Fe <sup>3+</sup> <sub>2.0</sub>                                 | 0.6000             | 0.6450             | 8.198               |
| <b>Co-10 (ZNF)</b> | Zn <sup>2+</sup> <sub>0.9</sub> Fe <sup>3+</sup> <sub>0.1</sub> | Co <sup>2+</sup> <sub>0.1</sub> Fe <sup>3+</sup> <sub>1.9</sub> | 0.6045             | 0.6500             | 8.218               |
| <b>Co-30 (ZNF)</b> | Zn <sup>2+</sup> <sub>0.7</sub> Fe <sup>3+</sup> <sub>0.3</sub> | Co <sup>2+</sup> <sub>0.3</sub> Fe <sup>3+</sup> <sub>1.7</sub> | 0.6135             | 0.6600             | 8.259               |
| <b>Co-50 (ZNF)</b> | Zn <sup>2+</sup> <sub>0.5</sub> Fe <sup>3+</sup> <sub>0.5</sub> | Co <sup>2+</sup> <sub>0.5</sub> Fe <sup>3+</sup> <sub>1.5</sub> | 0.6225             | 0.6700             | 8.299               |

81

82 Table S3: Represents oxygen position parameter and hopping lengths for all the prepared  
 83 ferrite samples.

| Sample Id   | U      | $\Delta (U - 0.375)$ | $H_A (\text{\AA})$ | $H_B (\text{\AA})$ |
|-------------|--------|----------------------|--------------------|--------------------|
| Co-00 (ZNF) | 0.3852 | 0.0102               | 3.650              | 2.980              |
| Co-10 (ZNF) | 0.3852 | 0.0102               | 3.642              | 2.974              |
| Co-30 (ZNF) | 0.3852 | 0.0102               | 3.634              | 2.967              |
| Co-50 (ZNF) | 0.3851 | 0.0101               | 3.630              | 2.964              |

84

85

Table S4: Raman active modes for each as-synthesized nanoferrites.

| Sample Id   | Raman active modes ( $\text{cm}^{-1}$ ) |       |             |             |          |             |             |
|-------------|-----------------------------------------|-------|-------------|-------------|----------|-------------|-------------|
|             | $A_1(3)$                                | $E_g$ | $T_{2g}(2)$ | $T_{2g}(3)$ | $B_2(3)$ | $A_{1g}(2)$ | $A_{1g}(1)$ |
| Co-00 (ZNF) | 302.2                                   | 334.3 | 479.5       | 515.1       | -----    | 628.7       | 671.6       |
| Co-10 (ZNF) | 297.4                                   | 333.7 | 461.9       | 507.6       | -----    | 630.4       | 676.4       |
| Co-30 (ZNF) | 296.6                                   | 332.9 | 459.5       | 539.9       | -----    | 611.2       | 657.8       |
| Co-50 (ZNF) | 292.6                                   | 318.4 | 464.3       | 535.2       | 602.9    | 641.7       | 674.9       |

86

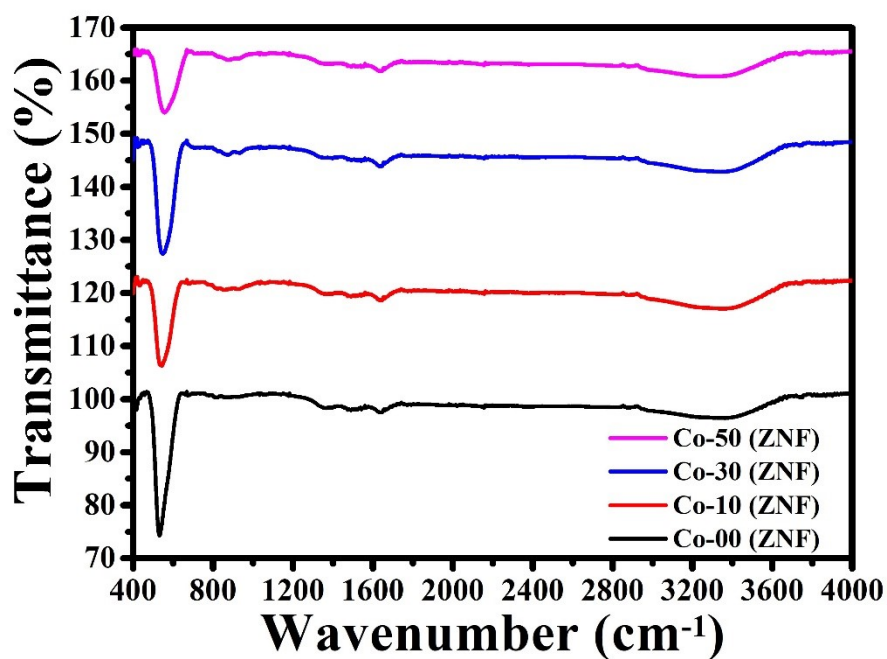

87

88

Figure S1: Room temperature FTIR spectra of all the ferrite samples.

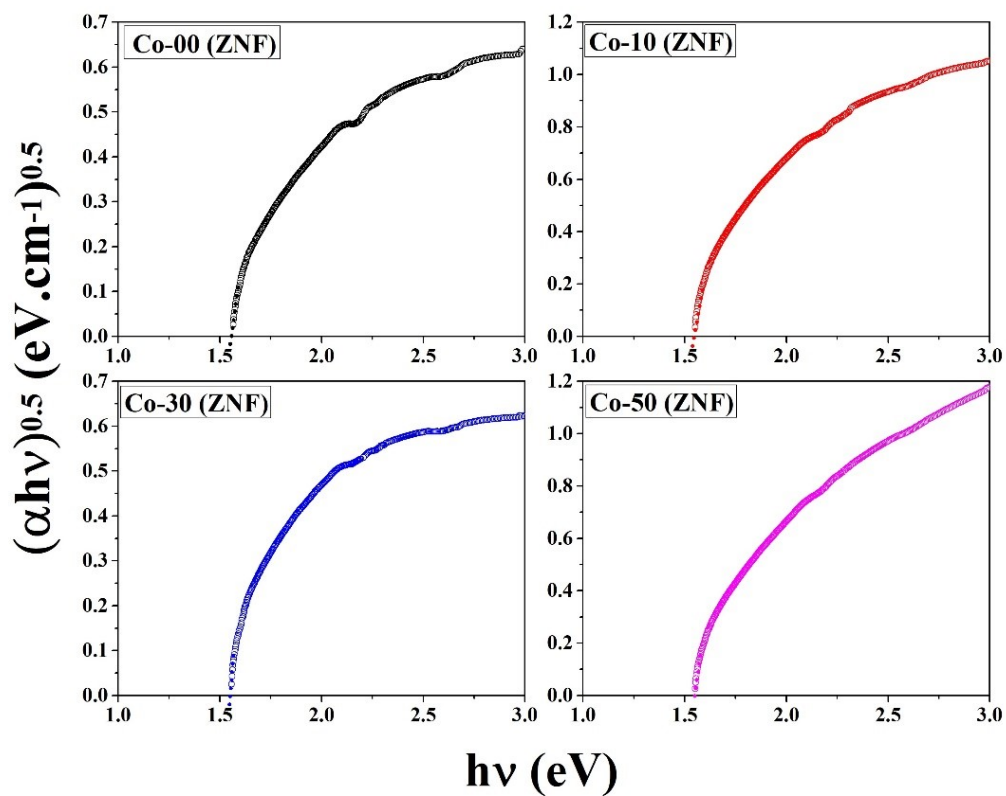

89

90

Figure S2: Tauc plots of all the as-synthesized samples.

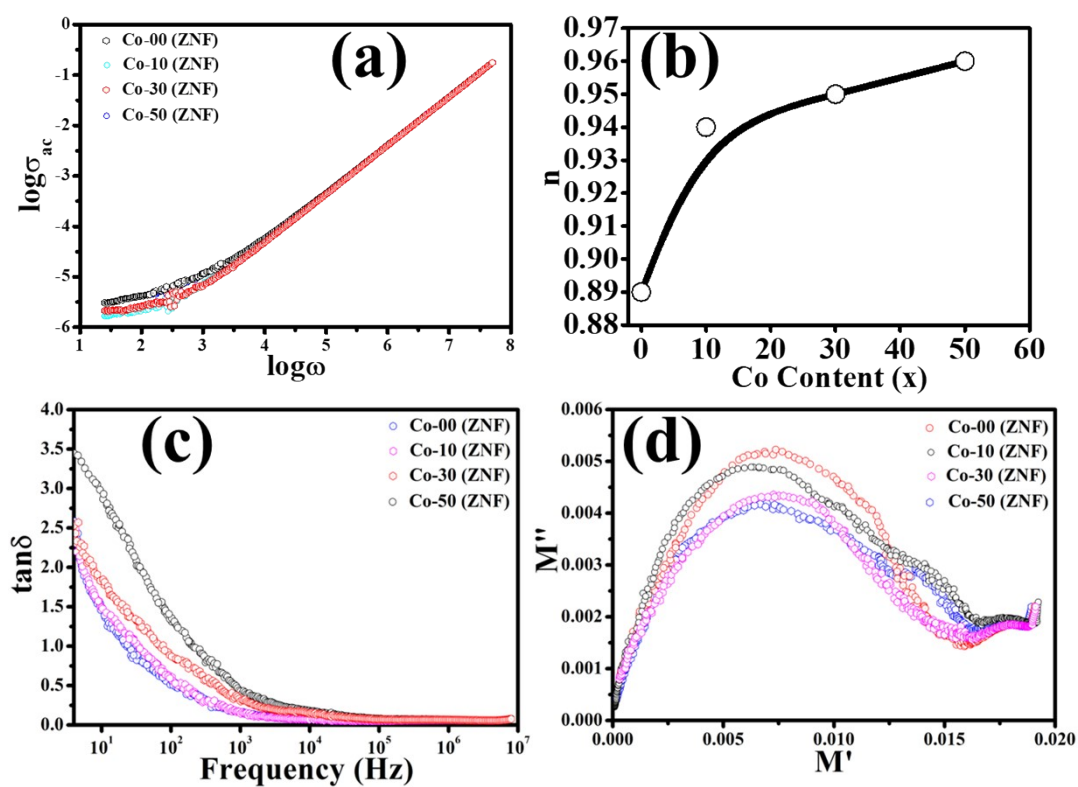

91

92 Figure S3: (a) Plot of AC conductivity against frequencies in logarithmic scale, (b) plot of  
93 exponent against cobalt ions concentration and (c) dielectric loss-tangent plots and (d) Cole-  
94 Cole plots of all the as-fabricated samples.

95

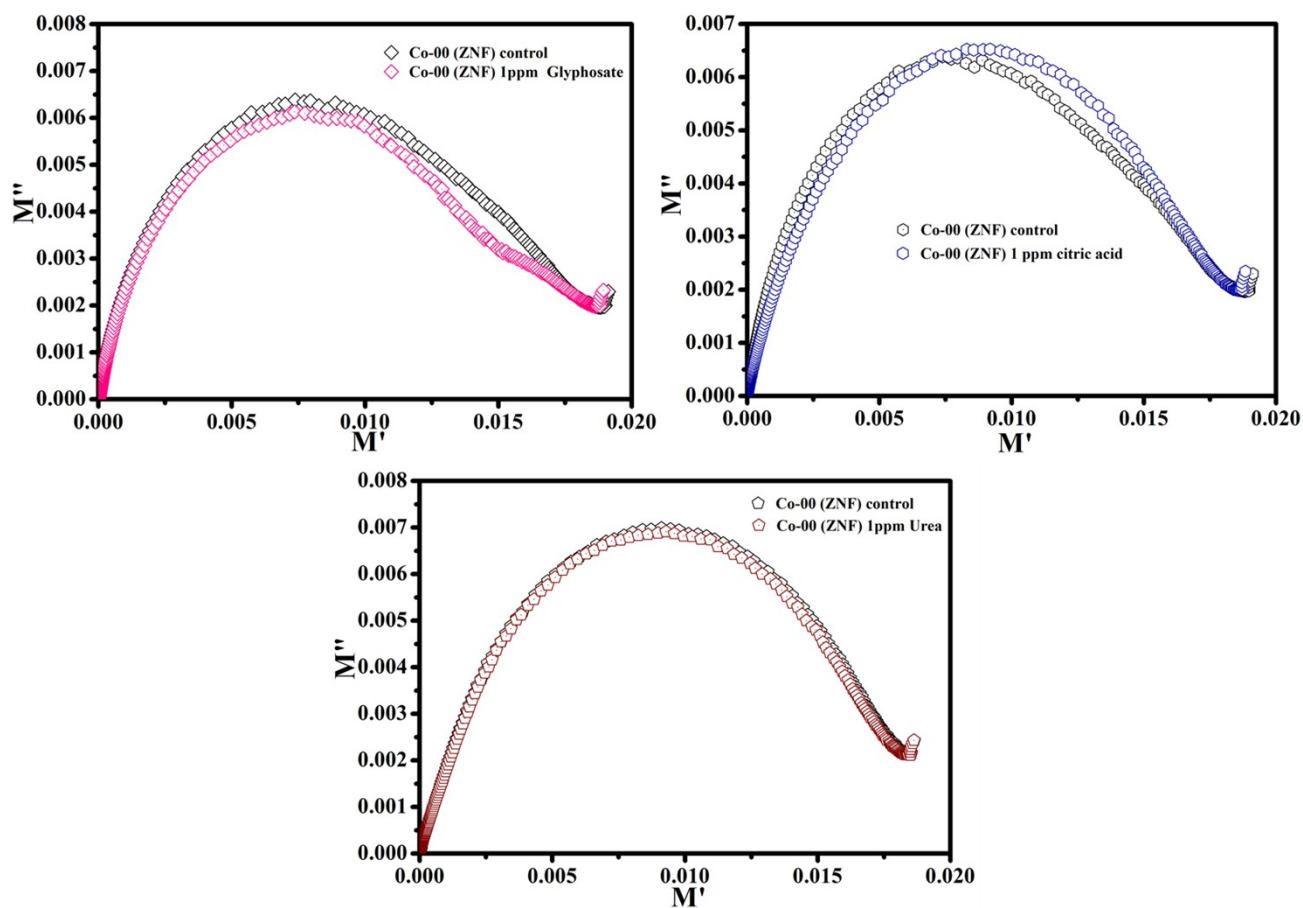

96  
97

98 Figure S4: Selectivity of Co-00 (ZNF) sample over other analytes including Glyphosate,  
99 Citric acid, and Urea solution.

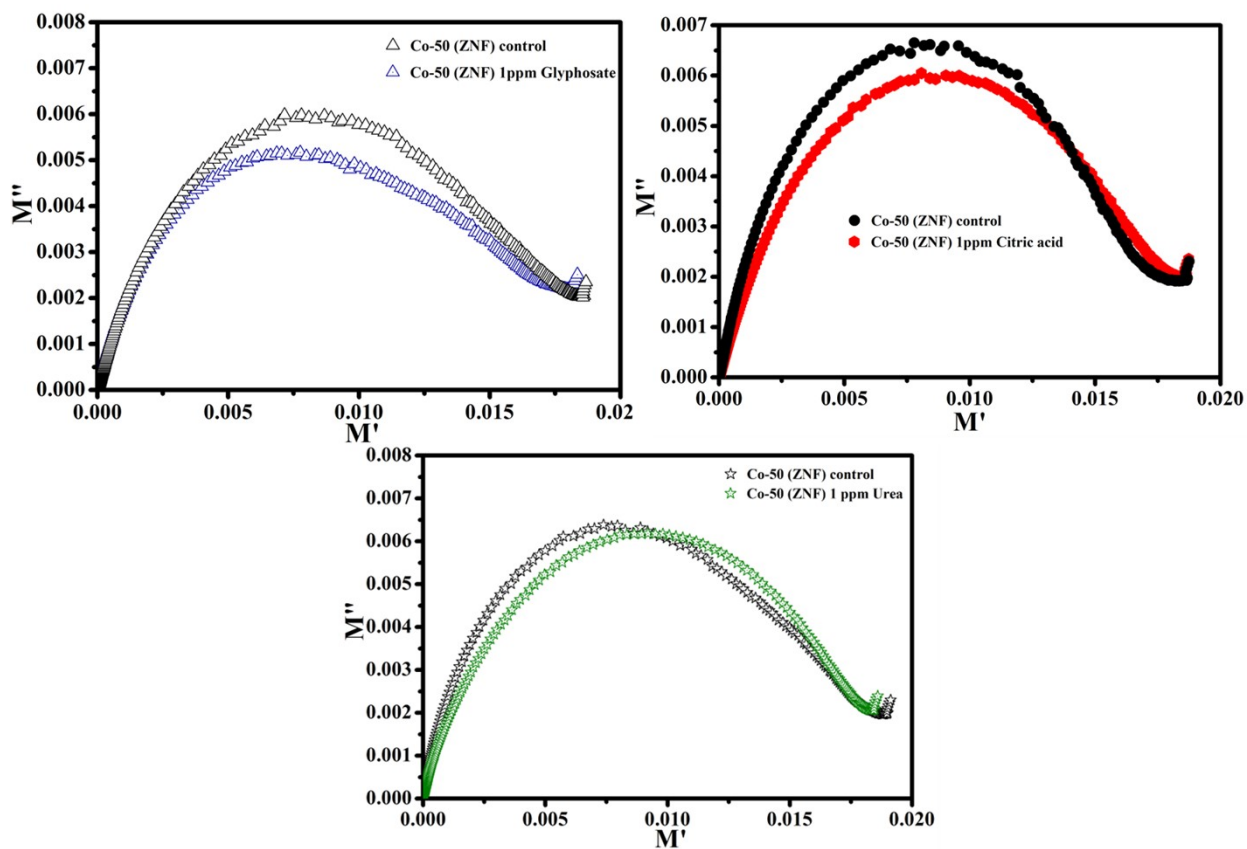

100

101 Figure S5: Selectivity of Co-50 (ZNF) sample over other analytes including Glyphosate,  
 102 Citric acid, and Urea solution.

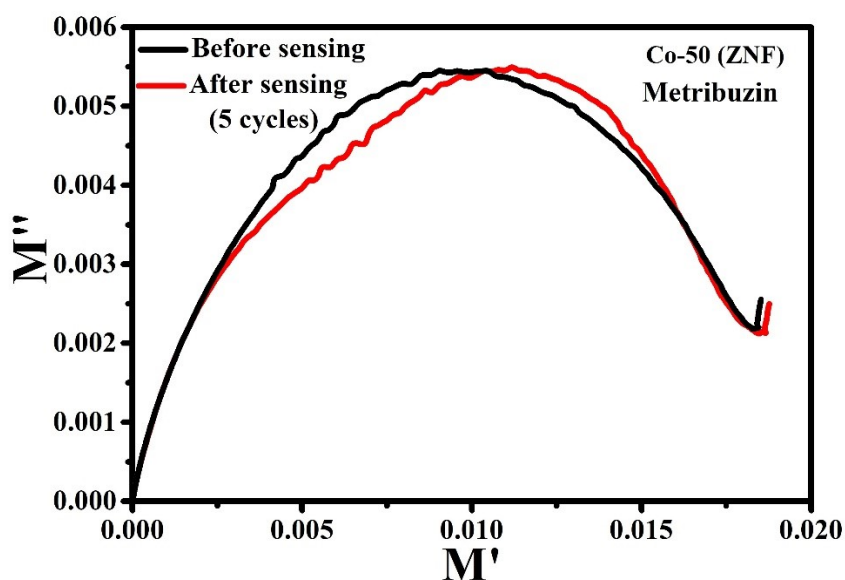

103

104 Figure S6: Cole-Cole plot of Co-50 (ZNF) sample before and after five consecutive cycles of  
 105 metribuzin sensing.



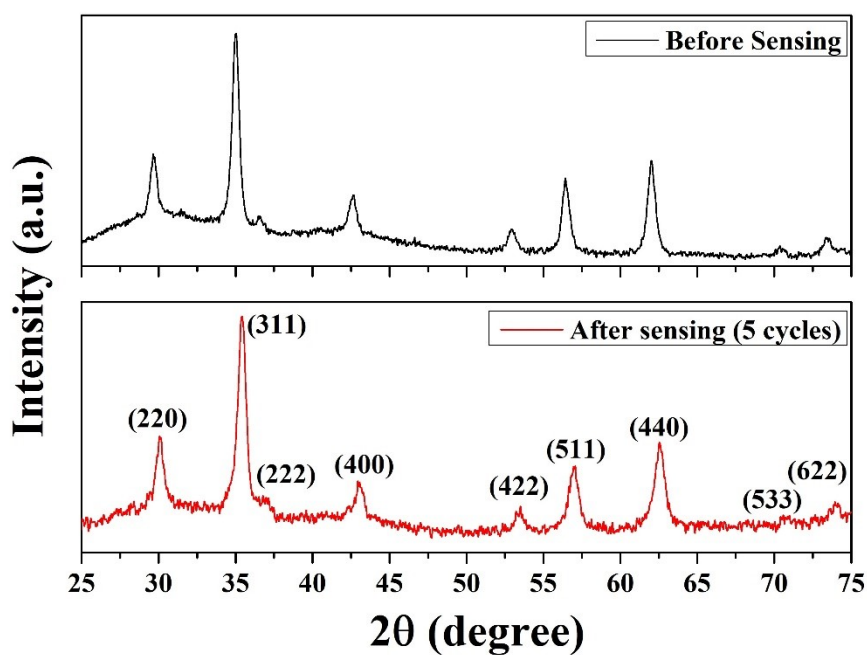

106

107 Figure S7: XRD pattern of Co-50 (ZNF) samples before and after five consecutive cycles of  
 108 metribuzin sensing.

109

## 110 References

111 1 M. P. Ghosh and S. Mukherjee, *Journal of Materials Science Materials in Electronics*,  
 112 2020, **31**, 6207–6216.

113 2 N. J. Mondal, R. Sonkar, B. Boro, M. P. Ghosh and D. Chowdhury, *Nanoscale Advances*,  
 114 2023, **5**, 5460–5475.

115 3 R. Sonkar, N. J. Mondal, S. Thakur, E. Saikia, M. P. Ghosh and D. Chowdhury, *Nanoscale*  
 116 *Advances*, 2023, **5**, 7042–7056.
